# Supplementary material
Source: PubMed Central journal article supplement (PMC6128500)
Supplement: jamadermatol-154-781-s002.pdf [file jamadermatol-154-781-s002.pdf]

## Supplementary Online Content

Wataya-Kaneda M, Ohno Y, Fujita Y, et al. Sirolimus gel treatment vs placebo for facial angiofibromas in patients with tuberous sclerosis complex: a randomized clinical trial. *JAMA Dermatol*. Published online May 19, 2018. doi:10.1001/jamadermatol.2018.1408

**eTable 1. A.** Rating criteria for improvements in cutaneous lesions from baseline

**B.** Rating criteria for composite improvement in angiofibromas based on efficacy variables

**eTable 2. A.** Composite improvement in angiofibromas at week 12 of treatment

**B.** Response rates of angiofibromas

**C.** Response rates of cephalic plaques

**eTable 3.** Adverse events

**eFigure 1. A.** Response rates of angiofibromas by age subpopulation

**B.** Response rates of the size of angiofibromas in all populations

**C.** Response rates of the size of angiofibromas by age subpopulation

**D.** Response rates of the color of angiofibromas in all populations

**E.** Response rates of the color of angiofibromas by age subpopulation

**F.** Response rates of plaques by age subpopulation

**eFigure 2.** Plots of whole blood sirolimus concentrations

This supplementary material has been provided by the authors to give readers additional information about their work.

**eTable 1-A. Rating criteria for improvements in cutaneous lesions from baseline**

| Rating              | Angiofibromas                                               |                                                                                                                            | Size of plaques          |
|---------------------|-------------------------------------------------------------|----------------------------------------------------------------------------------------------------------------------------|--------------------------|
|                     | Size                                                        | Color*                                                                                                                     |                          |
| Markedly improved   | Reduced in $\geq 75\%$ of lesions                           | Improved by $\geq 3$ reddishness levels in $\geq 50\%$ of lesions                                                          | Reduced by $\geq 75\%$   |
| Improved            | Reduced in 50-75% of lesions                                | Improved by 2 reddishness levels in $\geq 50\%$ of lesions or by $\geq 3$ reddishness levels in 25-50% of lesions          | Reduced by 50-75%        |
| Slightly improved   | Reduced in 25-50% of lesions                                | Improved by 1 reddishness level in $\geq 50\%$ of lesions or by 2 reddishness levels in 25-50% of lesions                  | Reduced by 25-50%        |
| Unchanged           | Not obviously changed                                       | Not obviously changed                                                                                                      | Not obviously changed    |
| Slightly aggravated | Increased or newly formed papules in 25-50% of lesions      | Aggravated by 1 reddishness level in $\geq 50\%$ of lesions or by 2 reddishness levels in 25-50% of lesions                | Increased by 25-50%      |
| Aggravated          | Increased or newly formed papules in $\geq 50\%$ of lesions | Aggravated by $\geq 2$ reddishness levels in $\geq 50\%$ of lesions or by $\geq 3$ reddishness levels in 25-50% of lesions | Increased by $\geq 50\%$ |

\*PANTONE® samples for the assessment of reddishness level

| Level | PANTONE | Sample                                                                              |
|-------|---------|-------------------------------------------------------------------------------------|
| 1     | 489C    |  |
| 2     | 486C    |  |
| 3     | 7416C   |  |
| 4     | 485C    |  |
| 5     | 704C    |  |
| 6     |         | Deeper than 704C                                                                    |

**eTable 1-B The rating criteria for composite improvement in angiofibromas based on the efficacy variables (size and color of angiofibromas)**

|                          |          | Improvement in the size |                     |                     |                   |                   |                   |
|--------------------------|----------|-------------------------|---------------------|---------------------|-------------------|-------------------|-------------------|
|                          |          | <b>A</b>                | <b>B</b>            | <b>C</b>            | <b>D</b>          | <b>E</b>          | <b>F</b>          |
| Improvement in the color | <b>A</b> | Aggravated              | Aggravated          | Aggravated          | *                 | *                 | *                 |
|                          | <b>B</b> | Aggravated              | Slightly aggravated | Slightly aggravated | Unchanged         | *                 | *                 |
|                          | <b>C</b> | Aggravated              | Slightly aggravated | Unchanged           | Slightly improved | Slightly improved | Improved          |
|                          | <b>D</b> | *                       | Unchanged           | Slightly improved   | Slightly improved | Improved          | Improved          |
|                          | <b>E</b> | *                       | *                   | Slightly improved   | Improved          | Improved          | Markedly improved |
|                          | <b>F</b> | *                       | *                   | Improved            | Improved          | Markedly improved | Markedly improved |

A, Aggravated; B: Slightly aggravated; C, unchanged; D, Slightly improved; E, improved; F, Markedly improved

\*: Should be assessed weighting the size and color of angiofibromas.

**eTable 2.A. Composite improvement in angiofibromas at week 12 of treatment**

|                   | Sirolimus  |       | Placebo    |       |
|-------------------|------------|-------|------------|-------|
|                   | % (95% CI) | n/N   | % (95% CI) | n/N*  |
| Markedly improved | 17 (6-35)  | 5/30  | 0 (0-11)   | 0/31  |
| Improved          | 43 (26-63) | 13/30 | 0 (0-11)   | 0/31  |
| Slightly improved | 37 (20-56) | 11/30 | 16 (6-34)  | 5/31  |
| Unchanged         | 3 (0-17)   | 1/30  | 84 (66-95) | 26/31 |

\*: One patient, whose out-of-focus photograph had been rated to be “unassessable” was excluded from the denominator.

**eTable 2.B. Response rates of angiofibromas**

|                  | Week 4    | Week 8     | Week 12    | Week 4 of follow-up |
|------------------|-----------|------------|------------|---------------------|
| Sirolimus        | 20 (8-39) | 43 (26-63) | 60 (41-77) | 10 (2-27)           |
| % (95% CI) , n/N | 6/30      | 13/30      | 18/30      | 3/30                |
| Placebo          | 0 (0-11)  | 0 (0-11)   | 0 (0-11)   | 0 (0-11)            |
| % (95% CI), n/N* | 0/32      | 0/32       | 0/32       | 0/32                |

\*: One patient, whose out-of-focus photograph had been rated to be “unassessable” was incorporated in the denominator as nonresponder.

**eTable 2.C. Response rates of cephalic plaques**

|                  | Week 4   | Week 8    | Week 12    | Week 4 of follow-up |
|------------------|----------|-----------|------------|---------------------|
| Sirolimus        | 8 (0-36) | 31 (9-61) | 46 (19-75) | 15 (2-46)           |
| % (95% CI) , n/N | 1/13     | 4/13      | 6/13       | 2/13                |
| Placebo          | 0 (0-21) | 0 (0-21)  | 6 (0-30)   | 6 (0-30)            |
| % (95% CI), n/N  | 0/15     | 0/16      | 1/16       | 1/16                |

**eTable 3. Adverse events**

| System Organ Class/<br>Preferred terms*                                     | Sirolimus       |                     |                 | Placebo         |                     |                 |
|-----------------------------------------------------------------------------|-----------------|---------------------|-----------------|-----------------|---------------------|-----------------|
|                                                                             | Total<br>N = 30 | Pediatric<br>n = 13 | Adult<br>n = 17 | Total<br>N = 32 | Pediatric<br>n = 14 | Adult<br>n = 18 |
| Any adverse event                                                           | 27 (90%)        | 10 (77%)            | 17(100%)        | 22 (69%)        | 10 (71%)            | 12 (67%)        |
| <b>Infections and infestations</b>                                          |                 |                     |                 |                 |                     |                 |
| Gastroenteritis                                                             | 1 (3%)          | 1 (8%)              | 0               | 0               | 0                   | 0               |
| Hordeolum                                                                   | 1 (3%)          | 1 (8%)              | 0               | 0               | 0                   | 0               |
| Impetigo <sup>†</sup>                                                       | 0               | 0                   | 0               | 1 (3%)          | 1 (7%)              | 0               |
| Influenza                                                                   | 3 (10%)         | 3 (23%)             | 0               | 0               | 0                   | 0               |
| Nasopharyngitis                                                             | 1 (3%)          | 1 (8%)              | 0               | 3 (9%)          | 3 (21%)             | 0               |
| Sinusitis                                                                   | 0               | 0                   | 0               | 1 (3%)          | 0                   | 1 (6%)          |
| Tonsillitis                                                                 | 0               | 0                   | 0               | 1 (3%)          | 1 (7%)              | 0               |
| Vulvovaginal candidiasis                                                    | 1 (3%)          | 0                   | 1 (6%)          | 0               | 0                   | 0               |
| Oral herpes                                                                 | 0               | 0                   | 0               | 1 (3%)          | 0                   | 1 (6%)          |
| <b>Neoplasms benign, malignant and unspecified (incl. cysts and polyps)</b> |                 |                     |                 |                 |                     |                 |
| Lymphangioma                                                                | 1 (3%)          | 0                   | 1 (6%)          | 0               | 0                   | 0               |
| Kidney angiomyolipoma                                                       | 1 (3%)          | 0                   | 1 (6%)          | 0               | 0                   | 0               |
| <b>Immune system disorders</b>                                              |                 |                     |                 |                 |                     |                 |
| Seasonal allergy                                                            | 1 (3%)          | 0                   | 1 (6%)          | 0               | 0                   | 0               |
| <b>Psychiatric disorders</b>                                                |                 |                     |                 |                 |                     |                 |
| Insomnia                                                                    | 0               | 0                   | 0               | 1 (3%)          | 1 (7%)              | 0               |
| <b>Nervous system disorders</b>                                             |                 |                     |                 |                 |                     |                 |
| Epilepsy                                                                    | 0               | 0                   | 0               | 1 (3%)          | 1 (7%)              | 0               |
| Paraesthesia                                                                | 0               | 0                   | 0               | 1 (3%)          | 0                   | 1 (6%)          |
| <b>Eye disorders</b>                                                        |                 |                     |                 |                 |                     |                 |
| Eye irritation <sup>†</sup>                                                 | 1 (3%)          | 1 (8%)              | 0               | 2 (6%)          | 1 (7%)              | 1 (6%)          |
| Ocular hyperaemia                                                           | 1 (3%)          | 1 (8%)              | 0               | 0               | 0                   | 0               |
| <b>Respiratory, thoracic and mediastinal disorders</b>                      |                 |                     |                 |                 |                     |                 |
| Epistaxis                                                                   | 1 (3%)          | 1 (8%)              | 0               | 0               | 0                   | 0               |
| Upper respiratory tract inflammation                                        | 0               | 0                   | 0               | 2 (6%)          | 1 (7%)              | 1 (6%)          |
| <b>Gastrointestinal disorders</b>                                           |                 |                     |                 |                 |                     |                 |
| Abdominal pain                                                              | 1 (3%)          | 0                   | 1 (6%)          | 0               | 0                   | 0               |
| Diarrhoea                                                                   | 0               | 0                   | 0               | 1 (3%)          | 1 (7%)              | 0               |
| Enterocolitis                                                               | 1 (3%)          | 1 (8%)              | 0               | 0               | 0                   | 0               |
| Gastric haemorrhage                                                         | 1 (3%)          | 0                   | 1 (6%)          | 0               | 0                   | 0               |
| Pancreatitis acute                                                          | 1 (3%)          | 0                   | 1 (6%)          | 0               | 0                   | 0               |
| Stomatitis                                                                  | 1 (3%)          | 0                   | 1 (6%)          | 2 (6%)          | 0                   | 2 (11%)         |
| Vomiting                                                                    | 0               | 0                   | 0               | 1 (3%)          | 1 (7%)              | 0               |
| Paraesthesia oral                                                           | 0               | 0                   | 0               | 1 (3%)          | 0                   | 1 (6%)          |
| <b>Skin and subcutaneous tissue disorders</b>                               |                 |                     |                 |                 |                     |                 |
| Acne                                                                        | 2 (7%)          | 0                   | 2 (12%)         | 0               | 0                   | 0               |
| Alopecia                                                                    | 0               | 0                   | 0               | 1 (3%)          | 0                   | 1 (6%)          |
| Alopecia areata                                                             | 1 (3%)          | 1 (8%)              | 0               | 0               | 0                   | 0               |
| Dermatitis acneiform                                                        | 1 (3%)          | 0                   | 1 (6%)          | 0               | 0                   | 0               |
| Dermatitis atopic                                                           | 0               | 0                   | 0               | 1 (3%)          | 1 (7%)              | 0               |
| Dermatitis contact                                                          | 1 (3%)          | 0                   | 1 (6%)          | 0               | 0                   | 0               |
| Dry skin                                                                    | 11 (37%)        | 4 (31%)             | 7 (41%)         | 4 (13%)         | 2 (14%)             | 2 (11%)         |
| Erythema                                                                    | 1 (3%)          | 1 (8%)              | 0               | 0               | 0                   | 0               |
| Pruritus                                                                    | 7 (23%)         | 1 (8%)              | 6 (35%)         | 4 (13%)         | 2 (14%)             | 2 (11%)         |
| Skin irritation                                                             | 1 (3%)          | 0                   | 1 (6%)          | 0               | 0                   | 0               |
| Asteatosis                                                                  | 1 (3%)          | 1 (8%)              | 0               | 0               | 0                   | 0               |
| Skin haemorrhage                                                            | 1 (3%)          | 0                   | 1 (6%)          | 0               | 0                   | 0               |
| <b>Musculoskeletal and connective tissue disorders</b>                      |                 |                     |                 |                 |                     |                 |
| Back pain                                                                   | 1 (3%)          | 0                   | 1 (6%)          | 0               | 0                   | 0               |
| <b>Renal and urinary disorders</b>                                          |                 |                     |                 |                 |                     |                 |
|                                                                             | 1 (3%)          | 0                   | 1 (6%)          | 0               | 0                   | 0               |

| System Organ Class/<br>Preferred terms*                 | Sirolimus       |                     |                 | Placebo         |                     |                 |
|---------------------------------------------------------|-----------------|---------------------|-----------------|-----------------|---------------------|-----------------|
|                                                         | Total<br>N = 30 | Pediatric<br>n = 13 | Adult<br>n = 17 | Total<br>N = 32 | Pediatric<br>n = 14 | Adult<br>n = 18 |
| Proteinuria                                             | 1 (3%)          | 0                   | 1 (6%)          | 0               | 0                   | 0               |
| General disorders and<br>administration site conditions |                 |                     |                 |                 |                     |                 |
| Application site irritation                             | 11 (37%)        | 4 (31%)             | 7 (41%)         | 9 (28%)         | 3 (21%)             | 6 (33%)         |
| Feeling abnormal                                        | 0               | 0                   | 0               | 1 (3%)          | 0                   | 1 (6%)          |
| Pyrexia                                                 | 1 (3%)          | 1 (8%)              | 0               | 1 (3%)          | 0                   | 1 (6%)          |
| Swelling                                                | 1 (3%)          | 0                   | 1 (6%)          | 0               | 0                   | 0               |
| Investigations                                          |                 |                     |                 |                 |                     |                 |
| Blood creatine<br>phosphokinase increased               | 0               | 0                   | 0               | 1 (3%)          | 1 (7%)              | 0               |
| Blood pressure decreased                                | 1 (3%)          | 1 (8%)              | 0               | 0               | 0                   | 0               |
| Blood triglycerides<br>increased                        | 0               | 0                   | 0               | 1 (3%)          | 0                   | 1 (6%)          |
| Injury, poisoning and procedural<br>complications       |                 |                     |                 |                 |                     |                 |
| Arthropod sting                                         | 1 (3%)          | 1 (8%)              | 0               | 0               | 0                   | 0               |
| Scratch                                                 | 0               | 0                   | 0               | 1 (3%)          | 0                   | 1 (6%)          |
| Contusion                                               | 0               | 0                   | 0               | 1 (3%)          | 1 (7%)              | 0               |
| Skin abrasion                                           | 0               | 0                   | 0               | 2 (6%)          | 1 (7%)              | 1 (6%)          |
| Skin wound                                              | 1 (3%)          | 0                   | 1 (6%)          | 0               | 0                   | 0               |

\* MedDRA version 19.0

eFigure 1

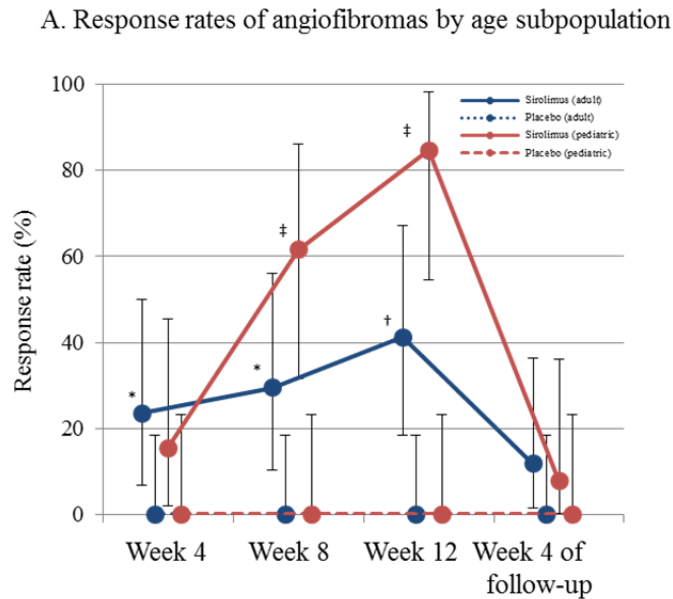

|                       |           |            |            |           |
|-----------------------|-----------|------------|------------|-----------|
| Sirolimus (adult)     | 26 (7-50) | 29 (10-56) | 41 (18-67) | 12 (2-36) |
| % (95% CI)            | 4/17      | 5/17       | 7/17       | 2/17      |
| n/N                   |           |            |            |           |
| Placebo (adult)       | 0 (0-19)  | 0 (0-19)   | 0 (0-19)   | 0 (0-19)  |
| % (95% CI)            | 0/18      | 0/18       | 0/18       | 0/18      |
| n/N                   |           |            |            |           |
| Sirolimus (pediatric) | 15 (2-46) | 62 (32-86) | 85 (55-98) | 8 (0-36)  |
| % (95% CI)            | 2/13      | 8/13       | 11/13      | 1/13      |
| n/N                   |           |            |            |           |
| Placebo (pediatric)   | 0 (0-23)  | 0 (0-23)   | 0 (0-23)   | 0 (0-23)  |
| % (95% CI)            | 0/14      | 0/14       | 0/14       | 0/14      |
| n/N                   |           |            |            |           |

eFigure 1

The response rates of angiofibromas by age subpopulation (A); response rates of the size of angiofibromas in all populations (B); response rates of the size of angiofibromas by age subpopulation (C); response rates of the color of angiofibromas in all populations (D); response rates of the color of angiofibromas by age subpopulation (E); and response rates of plaques by age subpopulation (F).

The response rate was defined as the proportion of patients rated to “Markedly improved” and “Improved.” The upper and lower 95% confidence intervals (95% CI) are shown as error bars. Fisher’s exact test was conducted for comparisons.

\*,  $P < .05$ ; †,  $P < .01$ ; ‡,  $P < .001$  (vs. placebo)

# eFigure 1

B. Response rates of the size of angiofibromas in all populations

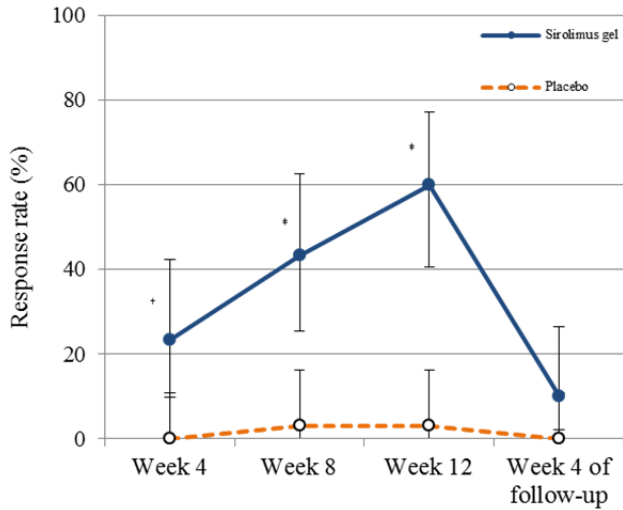

|                                |                    |                     |                     |                   |
|--------------------------------|--------------------|---------------------|---------------------|-------------------|
| Sirolimus<br>% (95% CI)<br>n/N | 23 (10-42)<br>7/30 | 43 (26-63)<br>13/30 | 60 (41-77)<br>18/30 | 10 (2-27)<br>3/30 |
| Placebo<br>% (95% CI)<br>n/N   | 0 (0-11)<br>0/32   | 3 (0-16)<br>1/32    | 3 (0-16)<br>1/32    | 0 (0-11)<br>0/32  |

C. Response rates of the size of angiofibromas by age subpopulation

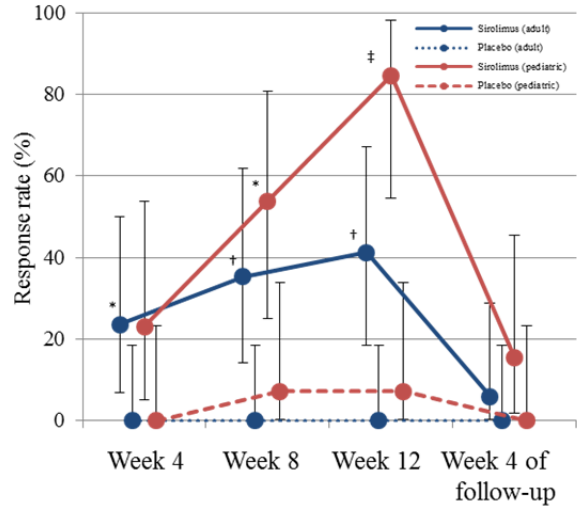

|                                               |                   |                    |                     |                   |
|-----------------------------------------------|-------------------|--------------------|---------------------|-------------------|
| Sirolimus<br>(adult)<br>% (95% CI)<br>n/N     | 24 (7-50)<br>4/17 | 35 (14-62)<br>6/17 | 41 (18-67)<br>7/17  | 6 (0-29)<br>1/17  |
| Placebo<br>(adult)<br>% (95% CI)<br>n/N       | 0 (0-19)<br>0/18  | 0 (0-19)<br>0/18   | 0 (0-19)<br>0/18    | 0 (0-19)<br>0/18  |
| Sirolimus<br>(pediatric)<br>% (95% CI)<br>n/N | 23 (5-54)<br>3/13 | 54 (25-81)<br>7/13 | 85 (55-98)<br>11/13 | 15 (2-46)<br>2/13 |
| Placebo<br>(paediatric)<br>% (95% CI)<br>n/N  | 0 (0-23)<br>0/14  | 7 (0-34)<br>1/14   | 7 (0-34)<br>1/14    | 0 (0-23)<br>0/14  |



# eFigure 1

D. Response rates of the color of angiofibromas in all populations

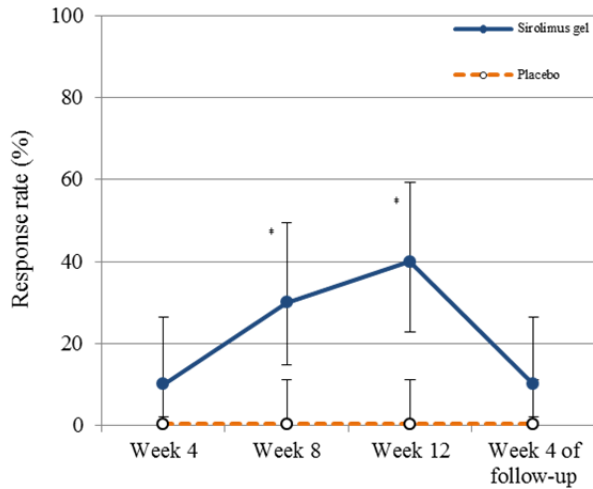

|                                |                   |                    |                     |                   |
|--------------------------------|-------------------|--------------------|---------------------|-------------------|
| Sirolimus<br>% (95% CI)<br>n/N | 10 (2-27)<br>3/30 | 30 (15-49)<br>9/30 | 40 (23-59)<br>12/30 | 10 (2-27)<br>3/30 |
| Placebo<br>% (95% CI)<br>n/N   | 0 (0-11)<br>0/32  | 0 (0-11)<br>0/32   | 0 (0-11)<br>0/32    | 0 (0-11)<br>0/32  |

E. Response rates of the color of angiofibromas by age subpopulation

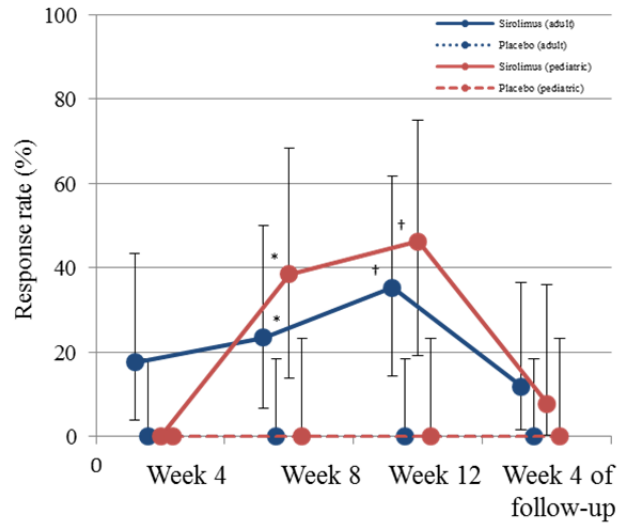

|                                               |                   |                    |                    |                   |
|-----------------------------------------------|-------------------|--------------------|--------------------|-------------------|
| Sirolimus<br>(adult)<br>% (95% CI)<br>n/N     | 18 (4-43)<br>3/17 | 24 (7-50)<br>4/17  | 35 (14-62)<br>6/17 | 12 (2-36)<br>2/17 |
| Placebo<br>(adult)<br>% (95% CI)<br>n/N       | 0 (0-19)<br>0/18  | 0 (0-19)<br>0/18   | 0 (0-19)<br>0/18   | 0 (0-19)<br>0/18  |
| Sirolimus<br>(pediatric)<br>% (95% CI)<br>n/N | 0 (N.A.)<br>0/13  | 39 (14-68)<br>5/13 | 46 (19-75)<br>6/13 | 8 (0-36)<br>1/13  |
| Placebo<br>(pediatric)<br>% (95% CI)<br>n/N   | 0 (N.A.)<br>0/14  | 0 (0-23)<br>0/14   | 0 (0-23)<br>0/14   | 0 (0-23)<br>0/14  |

# eFigure 1

F. Response rates of plaques by age subpopulation

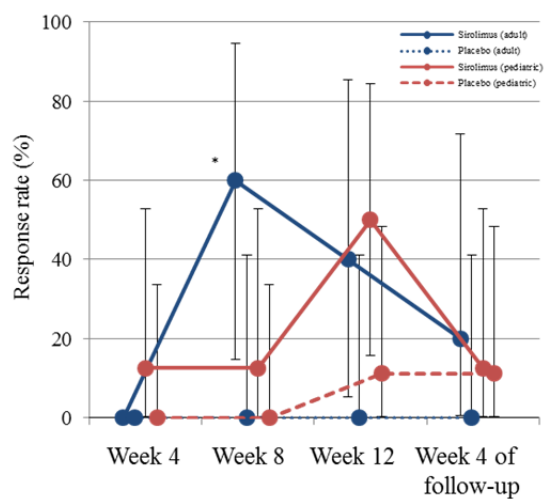

|                       |           |            |            |           |
|-----------------------|-----------|------------|------------|-----------|
| Sirolimus (adult)     | 0 (N.A.)  | 60 (15-95) | 40 (5-85)  | 20 (1-72) |
| % (95% CI)            | 0/5       | 3/5        | 2/5        | 1/5       |
| n/N                   |           |            |            |           |
| Placebo (adult)       | 0 (N.A.)  | 0 (0-41)   | 0 (0-41)   | 0 (0-41)  |
| % (95% CI)            | 0/7       | 0/7        | 0/7        | 0/7       |
| n/N                   |           |            |            |           |
| Sirolimus (pediatric) | 13 (0-53) | 13 (0-53)  | 50 (16-84) | 13 (0-53) |
| % (95% CI)            | 1/8       | 1/8        | 4/8        | 1/8       |
| n/N                   |           |            |            |           |
| Placebo (pediatric)   | 0 (0-34)  | 0 (0-34)   | 11 (0-48)  | 11 (0-48) |
| % (95% CI)            | 0/8       | 0/9        | 1/9        | 1/9       |
| n/N                   |           |            |            |           |

## eFigure 2

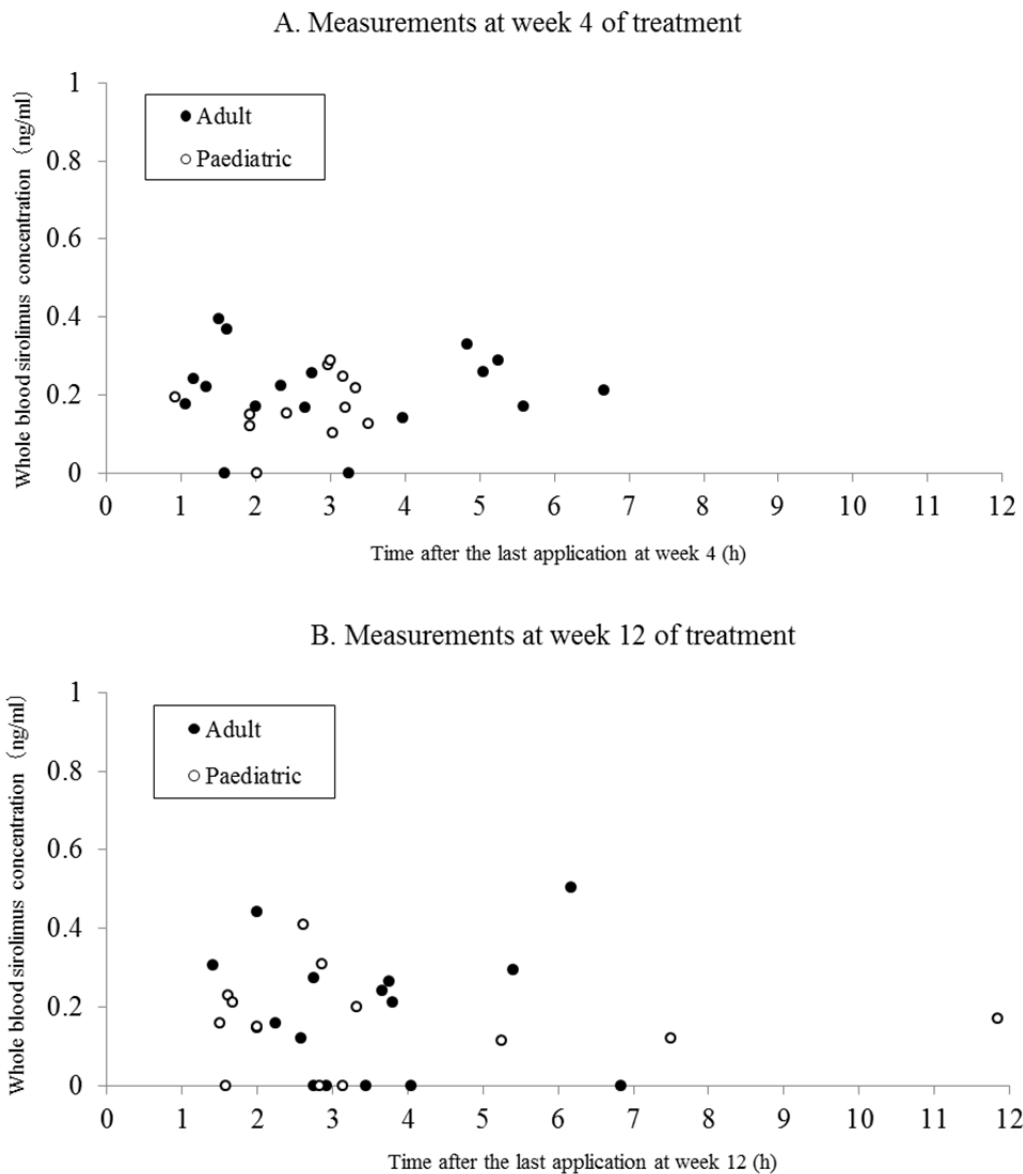

## eFigure 2

Plots of whole blood sirolimus concentrations measured by LC/MS/MS in patients after the last application at weeks 4 (Panel A) and 12 (Panel B) of treatment. Values below the detection limit (0.1 ng/mL) are expressed as 0 ng/mL. Twenty-seven (90%) of 30 samples were measurable at week 4 (Panel A), and 21 (70%) at week 12 (Panel B). Means  $\pm$  SD at weeks 4 and 12 of treatment were  $0.2 \pm 0.1$  ng/mL each, with the maximum levels of 0.4 and 0.5 ng/mL, respectively. LC/MS/MS, liquid chromatography/mass spectrometry.
